# Supplementary material for: Spatial and temporal variability of Terminal Classic Period droughts from multiple proxy records on the Yucatan Peninsula, Mexico
Source: Copernicus journal article supplement (doi:10.5194/cp-2019-68), 2019-06-11
Supplement: Supplementary file 1 [file cp-2019-68-supplement.pdf]

1 **Supplementary Information for: Spatial and temporal variability of**  
2 **Terminal Classic Period droughts from multiple proxy records on**  
3 **the Yucatan Peninsula, Mexico.**

4 **S1 Available proxy data**

5 Proxy records and the corresponding age model information used in this study are available from previous  
6 studies on the Yucatan Peninsula (Table S1). These twenty-three records are thought to represent changes in the  
7 climate, although each proxy type is likely affected by different climate variables.

8 The 23 records were collected from six sites on the Yucatan Peninsula and one site (Barranca de Amealco)  
9 in Central Mexico (see Figure 1 in main text). Of these records, 18 are oxygen isotope ( $\delta^{18}\text{O}$ ) type proxies (fossil  
10 shells and speleothems), three are a calcite-encrusted algae proxy, three are mineralogical proxies, and one is a tree  
11 ring reconstruction.

12 Table S1. Proxy data collected from the Yucatan Peninsula. One record (Barranca de Amealco) is from Central Mexico.

| Site                         | Location (Latitude, Longitude) | Elevation (masl) | Type of Proxy                                    | Proxy name                      | Sample resolution | Dating method                     | Source                   |
|------------------------------|--------------------------------|------------------|--------------------------------------------------|---------------------------------|-------------------|-----------------------------------|--------------------------|
| Aguada X'Caamal*             | 20.60°N, 89.70°W               | -                | Ostracod $\delta^{18}\text{O}$                   | <i>D. stvensoni</i> (3 samples) | 3-10 years        | Radiocarbon                       | Hodell et al. (2005a)    |
| Aguada X'Caamal              | 20.60°N, 89.70°W               | -                | $\delta^{18}\text{O}$ of calcite encrusted algae | Chara (3 samples)               | 3-10 years        | Radiocarbon                       | Hodell et al. (2005a)    |
| Aguada X'Caamal              | 20.60°N, 89.70°W               | -                | Gastropod $\delta^{18}\text{O}$                  | <i>P. coronatus</i> (3 samples) | 3-10 years        | Radiocarbon                       | Hodell et al. (2005a)    |
| Chichancanab*                | 19.89°N, 88.78°W               | 4                | Ostracod $\delta^{18}\text{O}$                   | <i>Cyprinotus sp.</i>           | 17-21 years       | Radiocarbon                       | Hodell et al. (1995)     |
| Chichancanab*                | 19.89°N, 88.78°W               | 4                | Gastropod $\delta^{18}\text{O}$                  | <i>Pyrgophorus sp.</i>          | 17-21 years       | Radiocarbon                       | Hodell et al. (1995)     |
| Chichancanab*                | 19.89°N, 88.78°W               | 4                | Ostracod $\delta^{18}\text{O}$                   | <i>Physocypria sp.</i>          | 17-21 years       | Radiocarbon                       | Hodell et al. (1995)     |
| Lake Petén-Itzá (Guatemala)* | 16.92°N, 89.83°W               | 80               | Ostracod $\delta^{18}\text{O}$                   | <i>Cytheridella ilosvayi</i>    | 10-28 years       | Radiocarbon and $^{210}\text{Pb}$ | Curtis et al. (1998)     |
| Lake Petén-Itzá (Guatemala)* | 16.92°N, 89.83°W               | 80               | Gastropod $\delta^{18}\text{O}$                  | <i>Pyrgophorus sp.</i>          | 10-52 years       | Radiocarbon and $^{210}\text{Pb}$ | Curtis et al. (1998)     |
| Punta Laguna*                | 20.63°N, 87.5°W                | 18               | Gastropod $\delta^{18}\text{O}$                  | <i>Pyrgophorus coronatus</i>    | 5-24 years        | Radiocarbon                       | Curtis and Hodell (1996) |
| Punta Laguna*                | 20.63°N, 87.5°W                | 18               | Ostracod $\delta^{18}\text{O}$                   | <i>Cytheridella ilosvayi</i>    | 5-24 years        | Radiocarbon                       | Curtis and Hodell (1996) |
| Chichancanab                 | 19.89°N, 88.78°W               | 4                | Mineralogical proxy                              | Calcite (% $\text{CaCO}_3$ )    | 16-21 years       | Radiocarbon                       | Hodell et al. (1995)     |

| Site                                          | Location<br>(Latitude,<br>Longitude) | Elevation<br>(masl) | Type of<br>Proxy                    | Proxy name                                                      | Sample<br>resolution | Dating<br>method      | Source                           |
|-----------------------------------------------|--------------------------------------|---------------------|-------------------------------------|-----------------------------------------------------------------|----------------------|-----------------------|----------------------------------|
| Chichancanab*                                 | 19.89°N,<br>88.78°W                  | 4                   | Mineralogical<br>proxy              | Sediment<br>density                                             | 2-6 years            | Radiocarbon           | Hodell et al. (2005b)            |
| Lake Peten-<br>Itza<br>(Guatemala)*           | 17.00°N,<br>89.78°W                  | 80                  | Mineralogical<br>proxy              | Magnetic<br>Susceptibility                                      | 5 years              | Radiocarbon           | Escobar (2010)                   |
| Tzabnah Cave,<br>Tecoh                        | 20.74°N,<br>89.48°W                  | 20                  | Speleothem<br>$\delta^{18}\text{O}$ | Speleothem<br>(Chaac)                                           | 1-8 years            | U-Th dating           | Medina-Elizalde et al.<br>(2010) |
| Barranca de<br>Amealco<br>(Central<br>Mexico) | 19.79°N,<br>91.03°W                  | 2,605               | Tree Ring<br>Reconstruction         | Palmer<br>Drought<br>Severity<br>Index (PDSI)<br>reconstruction | 1 year               | Dendro-<br>chronology | Stahle et al. (2011)             |
| Macal Chasm,<br>Belize                        | 16.883°N,<br>89.108°W                | 530                 | Speleothem<br>$\delta^{18}\text{O}$ | Macal<br>Speleothem                                             | 1-10 years           | U-Th dating           | Akers et al. (2016)              |
| Yok Balum<br>Cave, Belize                     | 16.208°N,<br>89.074°W                | 366                 | Speleothem<br>$\delta^{18}\text{O}$ | Yok Balum<br>Speleothem                                         | 1 year               | U-Th dating           | Kennett et al. (2012)            |

14 **S2 Changepoint analysis graphs**

15           The results of the changepoint analysis are shown in graphical form below to illustrate where significant  
16 changes in the mean and variance occur. In each graph, the TCP is highlighted in orange. Note that due to the  
17 inability of the changepoint package in R to include missing values, the TCP appears to be of a different length in  
18 each graph; however, the orange highlighted section represents the relative number of observations in each proxy  
19 record that fall within the TCP. Therefore, the x-axis on these graphs does not represent true time; rather it is an  
20 index that represents the position of each observation in the time series. An index of zero represents the  
21 measurement closest to the present day, with an increasing index indicating measurements further into the past.

22           In Figure S1, the mean of the entire time series is shown in blue on the mean changepoint graphs.  
23 Changepoints in the mean are indicated by a break in the horizontal red line. For all records, a segment of the record  
24 with a mean below the blue line indicates decreased moisture availability, while a segment with the mean above the  
25 blue line indicates a period of increased moisture availability. The shaded blue area indicates a 20% change in the  
26 mean.

27           In Figure S2, changes in the variance are shown by vertical red lines at the location where the changepoint  
28 occurs.

29

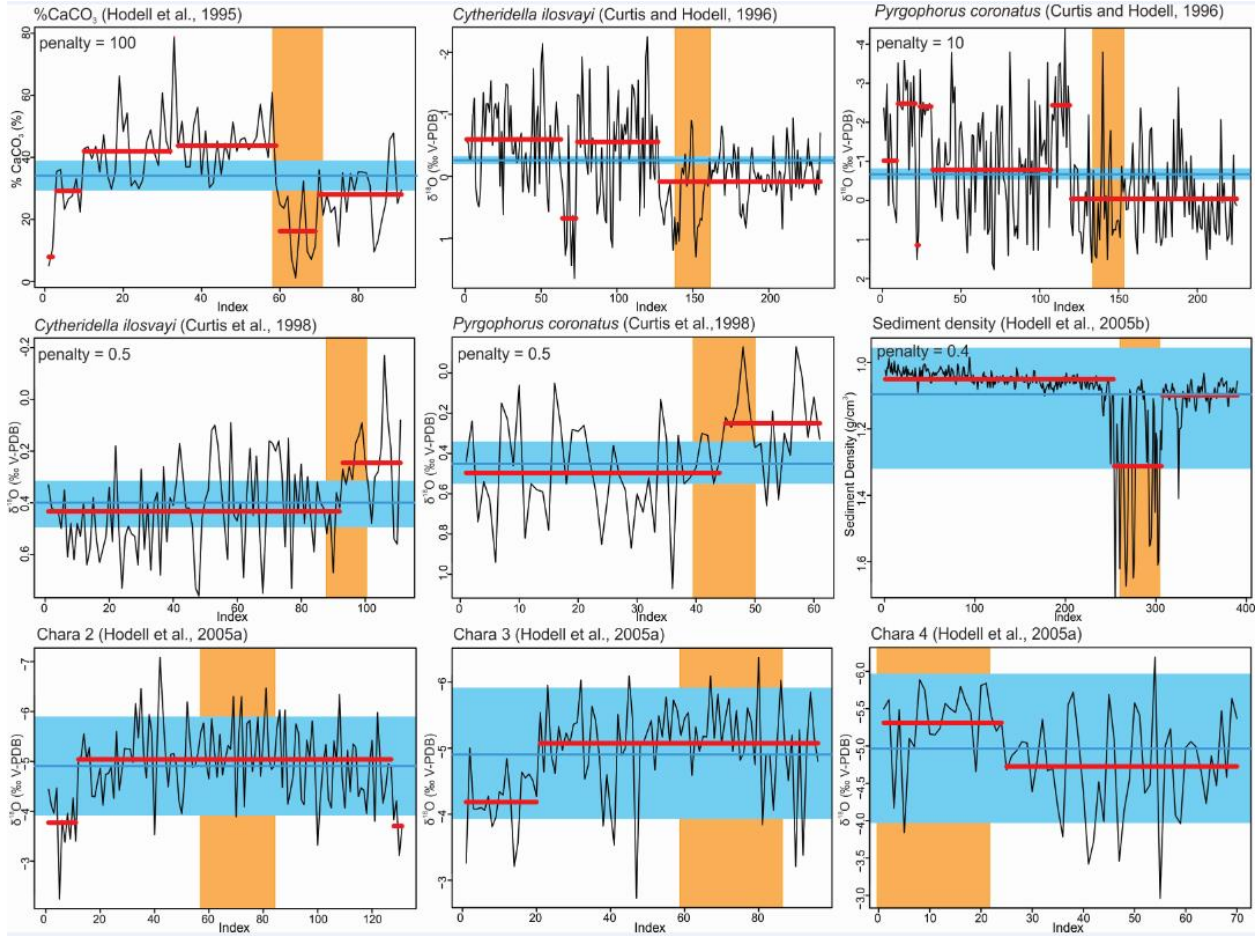

31

32 **Figure S1 Results of the changepoint analysis for 23 proxy records from the Yucatan Peninsula. Horizontal red lines**  
 33 **indicate where changepoints in the mean value of the proxy record occur. The blue horizontal line shows the mean of the**  
 34 **entire time series, while the blue shaded area represents a 20% change in that mean. The orange shaded area highlights**  
 35 **the TCP in each record. An index of zero represents the measurement closest to the present day, with an increasing index**  
 36 **indicating measurements further into the past.**

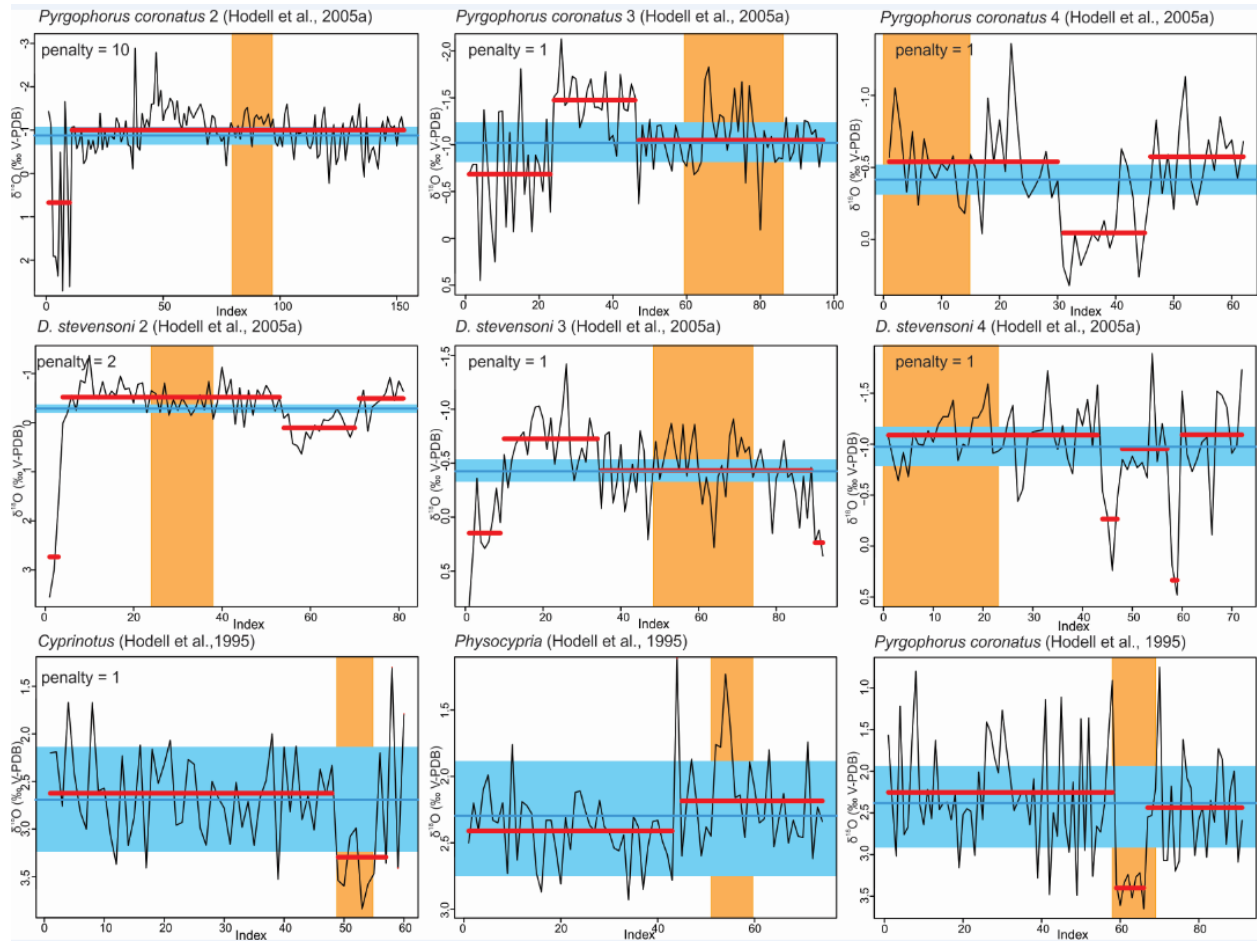

37

38 **Figure S1 Continued: Results of the changepoint analysis for 23 proxy records from the Yucatan Peninsula. Horizontal**  
 39 **red lines indicate where changepoints in the mean value of the proxy record occur. The blue horizontal line shows the**  
 40 **mean of the entire time series, while the blue shaded area represents a 20% change in that mean. The orange shaded area**  
 41 **highlights the TCP in each record. An index of zero represents the measurement closest to the present day, with an**  
 42 **increasing index indicating measurements further into the past**

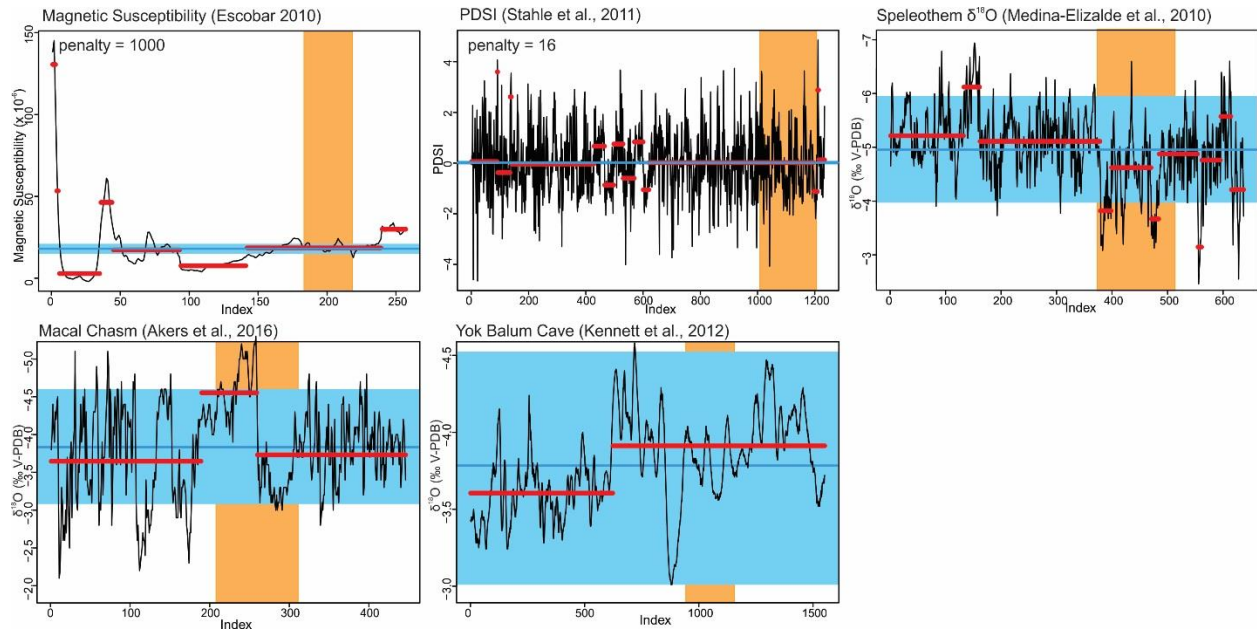

43

44 **Figure S1 Continued: Results of the changepoint analysis for 23 proxy records from the Yucatan Peninsula. Horizontal**  
 45 **red lines indicate where changepoints in the mean value of the proxy record occur. The blue horizontal line shows the**  
 46 **mean of the entire time series, while the blue shaded area represents a 20% change in that mean. The orange shaded area**  
 47 **highlights the TCP in each record. An index of zero represents the measurement closest to the present day, with an**  
 48 **increasing index indicating measurements further into the past.**

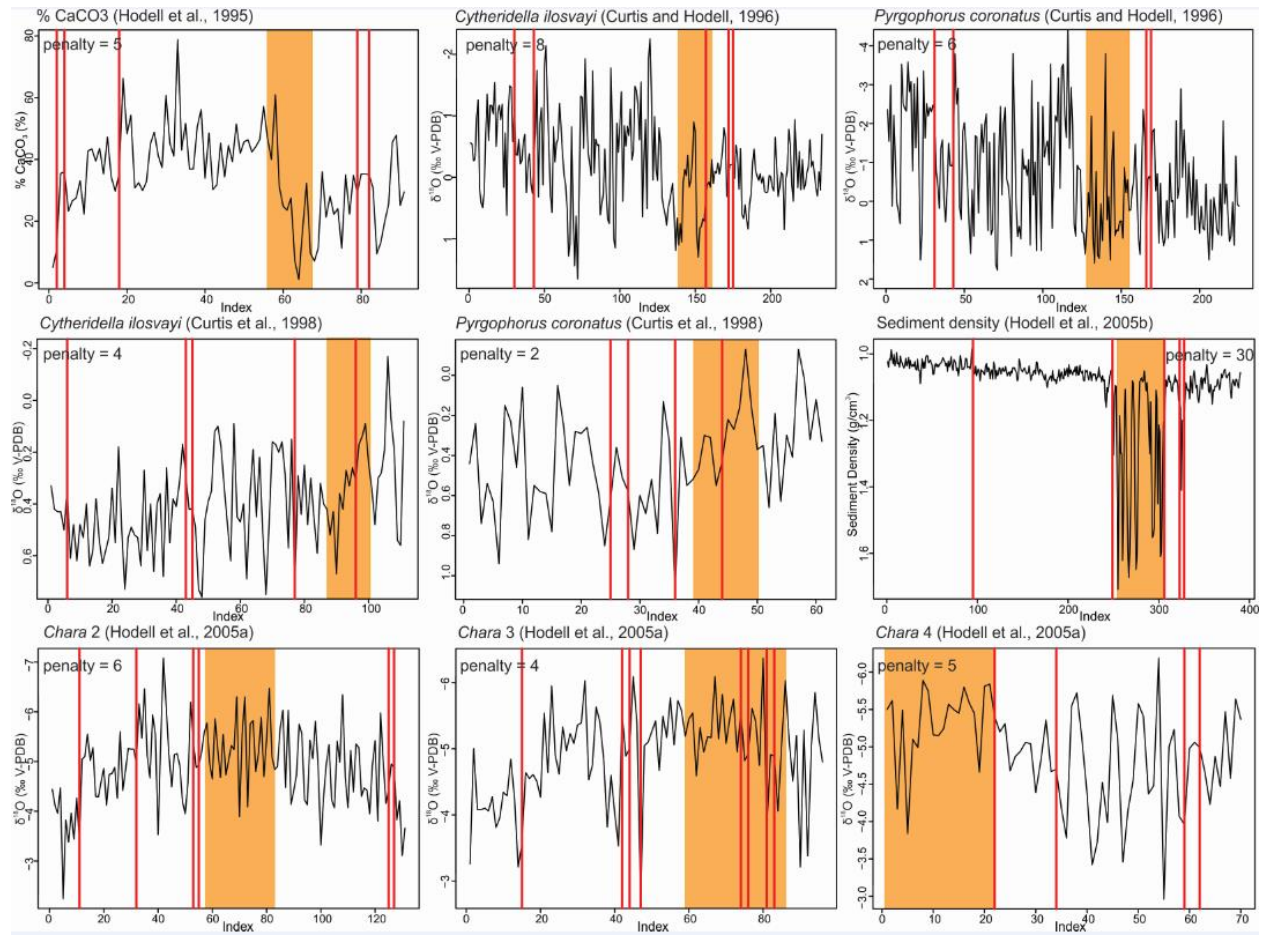

49

50 **Figure S2 Results of the changepoint analysis for 23 proxy records from the Yucatan Peninsula. Vertical red lines**  
 51 **indicate where changepoints in the variance of the proxy record occur. The orange shaded area highlights the TCP in**  
 52 **each record. An index of zero represents the measurement closest to the present day, with an increasing index indicating**  
 53 **measurements further into the past.**



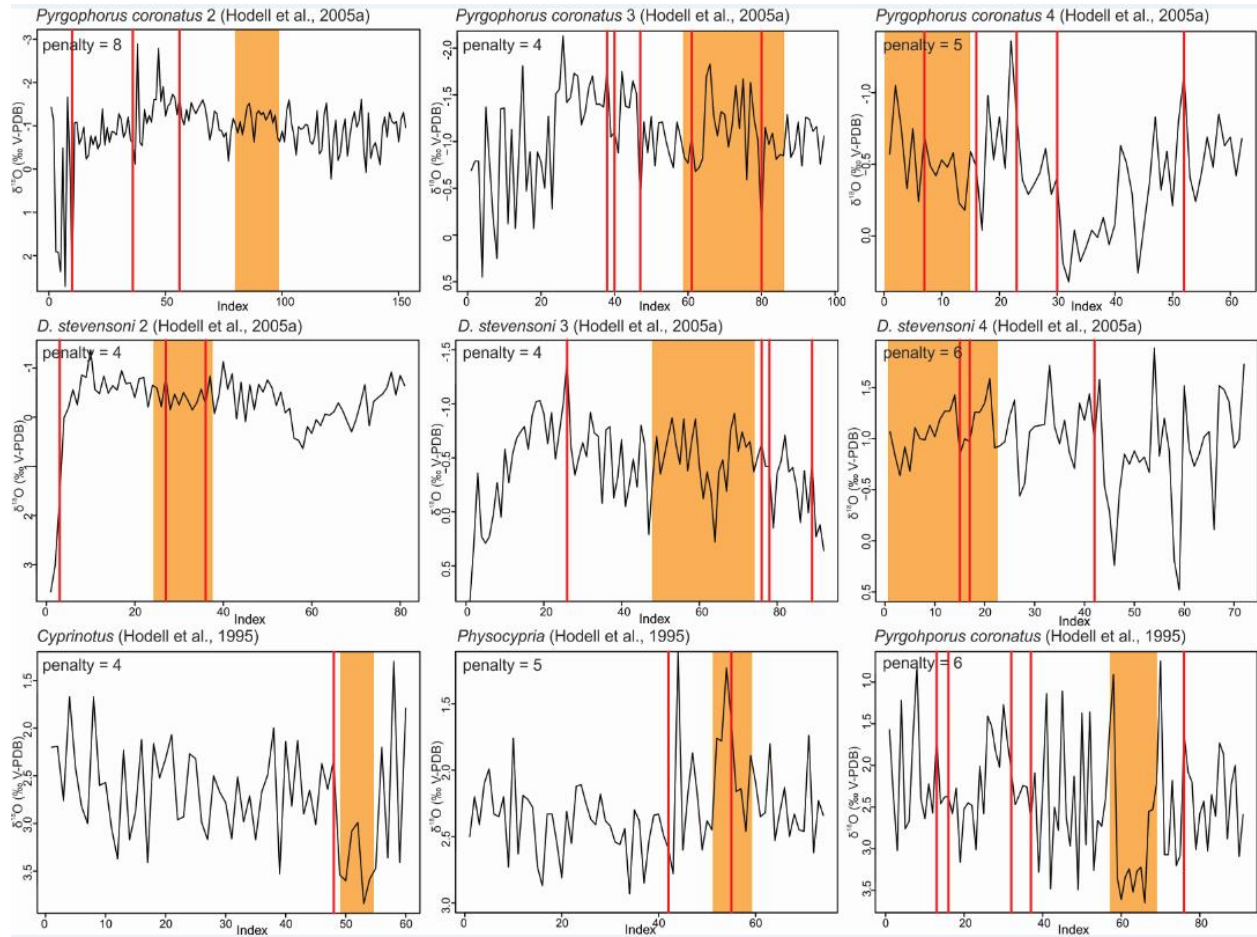

54

55 **Figure S2 Continued: Results of the changepoint analysis for 23 proxy records from the Yucatan Peninsula. Vertical red**  
 56 **lines indicate where changepoints in the variance of the proxy record occur. The orange shaded area highlights the TCP**  
 57 **in each record. An index of zero represents the measurement closest to the present day, with an increasing index**  
 58 **indicating measurements further into the past.**

59

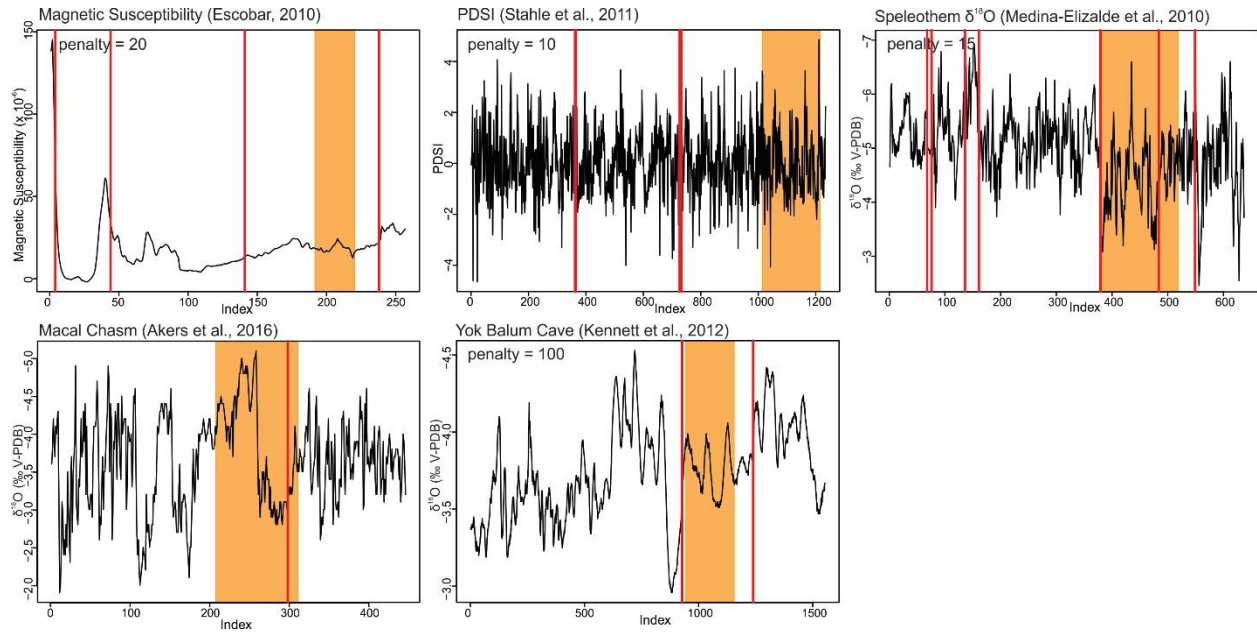

60

61 **Figure S2 Continued: Results of the changepoint analysis for 23 proxy records from the Yucatan Peninsula. Vertical red**  
 62 **lines indicate where changepoints in the variance of the proxy record occur. The orange shaded area highlights the TCP**  
 63 **in each record. An index of zero represents the measurement closest to the present day, with an increasing index**  
 64 **indicating measurements further into the past.**
